# Supplementary material for: Conditioned Medium from Canine Amniotic Membrane-Derived Mesenchymal Stem Cells Improved Dog Sperm Post-Thaw Quality-Related Parameters
Source: PubMed Central journal article supplement (PMC7603003; doi:10.3390/ani10101899), 2020-10-16
Supplement: animals-10-01899-s001.pdf [file animals-10-01899-s001.pdf]

Article

# Conditioned Medium from Canine Amniotic Membrane-Derived Mesenchymal Stem Cells Improved Dog Sperm Post-Thaw Quality-Related Parameters

Feriel Yasmine Mahiddine <sup>1</sup>, Jin Wook Kim <sup>1</sup>, Ahmad Yar Qamar <sup>2,3,4</sup>, Jeong Chan Ra <sup>5</sup>, Soo Hyun Kim <sup>5</sup>, Eun Joong Jung <sup>5</sup> and Min Jung Kim <sup>1,\*</sup>

<sup>1</sup> Department of Theriogenology and Biotechnologies, College of Veterinary Medicine, Seoul National University, Seoul 08826, Korea; yasmini19@snu.ac.kr (F.Y.M.); vet\_chris@snu.ac.kr (J.W.K.)

<sup>2</sup> Laboratory of Theriogenology, College of Veterinary Medicine, Chungnam National University, Daejeon 34134, Korea; ahmad.qamar@uvas.edu.pk

<sup>3</sup> Department of Clinical Sciences, College of Veterinary and Animal Sciences, Jhang 35200, Pakistan

<sup>4</sup> Department of Clinical Sciences, Sub-Campus University of Veterinary and Animal Sciences, Lahore 54000, Pakistan

<sup>5</sup> Cell Physiology Research Center, Naturecell Co., Ltd., Seoul 07238, Korea; jcra@stemcellbio.com (J.C.R.); hellena1710@braincell.co.kr (S.H.K.); eunjjan@stemcellbio.com (E.J.J.)

\* Correspondence: tinia19@snu.ac.kr; Tel.: +82-2-880-1180

Received: 08 September 2020; Accepted: 14 October 2020; Published: date

## Supplementary Data

### Confirmation of pluripotency genes expression

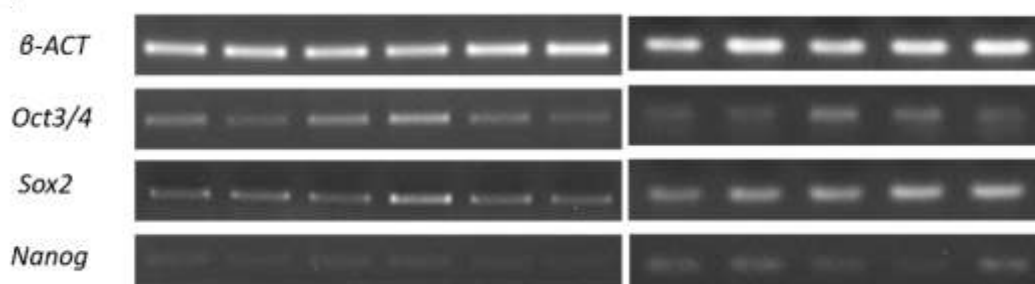

**Figure S1.** Confirmation of pluripotent genes expressions in all canine amniotic membrane-derived mesenchymal stem cell lines (cAMSC) ( $n = 11$ ) using qPCR.

**Table S1.** List of primers used for quantitative polymerase chain reaction (qPCR).

| Gene                      | Primer Sequence (5'-3')                                  | Product size (bp) | Temperature (°C) | NCBI Accession No. |
|---------------------------|----------------------------------------------------------|-------------------|------------------|--------------------|
| $\beta$ -ACT <sup>1</sup> | F - GCTACGTCGCCCTGGACTTC<br>R - GCCCGTCGGGTAGTTCGTAG     | 86                | 60               | AF021873.2         |
| Oct3/4 <sup>2</sup>       | F - CGAGTGAGAGGCAACCTGGAGA<br>R - CCACACTCGGACCACATCCTTC | 114               | 60               | XM_538830          |
| Sox2 <sup>3</sup>         | F - CAGACCTACATGAACGGCTCGC<br>R - CCTGGAGTGGGAGGAGGAGGTA | 147               | 60               | XM_005639752       |
| Nanog <sup>4</sup>        | F - GAATAACCCGAATTGGAGCA<br>R - AGTTGTGGAGCGGATTGTTC     | 125               | 60               | XM_022411387       |

<sup>1</sup>  $\beta$ -ACT, beta-actin; <sup>2</sup> Oct3/4, octamer binding transcription factor 3/4, <sup>3</sup> Sox2, SRY (sex determining region Y)-box 2, <sup>4</sup> Nanog, homeobox protein.

**Table S2.** Proteins found in canine amniotic membrane-derived mesenchymal stem cells (AMSC) derived conditioned medium.

| Category / Function                                                                | Protein name                                          | Gene      | Molecular weight (Da) | Accessions |
|------------------------------------------------------------------------------------|-------------------------------------------------------|-----------|-----------------------|------------|
| Extracellular matrix component, growth factor, anti-apoptosis, calcium ion binding | Secreted protein acidic and cysteine rich/Osteonectin | SPARC     | 35390                 | E2RMA3     |
| Growth factor, anti-oxidant, metal binding                                         | Serum albumin                                         | ALB       | 70558                 | F2Z4Q6     |
| Intermediate filament                                                              | Keratin, type I cytoskeletal 10                       | KRT10     | 57821                 | F1PYU9     |
| Extra-cellular matrix component, cell proliferation                                | Lumican                                               | LUM       | 38665                 | E2R416     |
| Intermediate filament                                                              | Keratin, type II cytoskeletal 1                       | KRT1      | 63846                 | F1PTY1     |
| Growth factor, glycoprotein, steroidogenesis stimulation                           | Metalloproteinase inhibitor 1                         | TIMP1     | 29250                 | F1PQS2     |
| Growth factor                                                                      | Insulin like growth factor binding protein 7          | IGFBP7    | 29907                 | E2RNL2     |
| Apolipoprotein, cholesterol metabolism, anti-oxidant                               | Apolipoprotein E                                      | APOE      | 37258                 | F1PJ74     |
| Intermediate filament                                                              | Keratin 14                                            | KRT14     | 52621                 | F1QOR0     |
| Cell metabolism                                                                    | Actin, cytoplasmic 1                                  | ACTB      | 018840                | 42052      |
| Intermediate filament                                                              | Vimentin                                              | VIM       | 53622                 | F1PLS4     |
| Intermediate filament                                                              | Keratin 75                                            | KRT75     | 59713                 | E2R917     |
| Extra-cellular matrix component                                                    | Follistatin like 1                                    | FSTL1     | 36073                 | F1PY69     |
| Intermediate filament                                                              | Uncharacterized protein                               | KRT5      | 62919                 | E2R8Z5     |
| Extra-cellular matrix component                                                    | Collagen type III alpha 1 chain                       | COL3A1    | 139948                | F1PG69     |
| Intermediate filament                                                              | Uncharacterized protein                               | KRT6A     | 60975                 | F1PTS8     |
| Anti-oxidant                                                                       | Thioredoxin                                           | TXN       | 11665                 | J9NWJ5     |
| Intermediate filament                                                              | Uncharacterized protein                               | KRT42     | 50182                 | E2R7W6     |
| Enzyme                                                                             | Malate dehydrogenase                                  | MDH1      | 38564                 | E2QV08     |
| Growth factor                                                                      | Alpha 2-HS glycoprotein                               | AHSG      | 40021                 | E2QUV3     |
| Cell metabolism                                                                    | GC, vitamin D binding protein                         | GC        | 55997                 | F1P841     |
| Cell metabolism                                                                    | Plasminogen activator, urokinase receptor             | PLAUR     | 27149                 | E2RGN0     |
| Cell metabolism                                                                    | Alpha-fetoprotein                                     | AFP       | 70491                 | F1PXN2     |
| Cell metabolism                                                                    | Uncharacterized protein                               | YWHAZ     | 27899                 | F1PBL1     |
| Apolipoprotein, sperm motility, cholesterol metabolism                             | Apolipoprotein A-I                                    | APOA1     | 30178                 | P02648     |
| Intermediate filament                                                              | Uncharacterized protein                               | KRT4      | 64360                 | E2QUU4     |
| Intermediate filament                                                              | Keratin, type I cytoskeletal 9                        | KRT9      | 65274                 | F1QON7     |
| Cell metabolism                                                                    | Uncharacterized protein                               | LOC477072 | 112612                | F6V1W9     |
| Enzyme                                                                             | Triosephosphate isomerase                             | TPI1      | 32085                 | A0A0A0MPD0 |
| Enzyme                                                                             | Purine nucleoside phosphorylase                       | PNP       | 32566                 | F1PQM1     |
| Cell metabolism                                                                    | Hemoglobin subunit beta                               | HBB       | 16100                 | P60524     |
| Growth factor                                                                      | Fibronectin                                           | FN1       | 270608                | F1P6H7     |
| Extra-cellular matrix component                                                    | Collagen alpha-1(I) chain                             | COL1A1    | 140042                | F1Q3I5     |
| Intermediate filament                                                              | Keratin 24                                            | KRT24     | 56819                 | E2R150     |
| Enzyme                                                                             | ATP synthase subunit d, mitochondrial                 | ATP5PD    | 18679                 | J9P8U0     |

|                                 |                                                          |              |        |        |
|---------------------------------|----------------------------------------------------------|--------------|--------|--------|
| Anti-oxidant                    | Ferritin                                                 | LOC102154317 | 19901  | E2RRH1 |
| Anti-oxidant                    | Decorin                                                  | DCN          | 40297  | Q29393 |
| Extra-cellular matrix component | Uncharacterized protein                                  | LGALS3BP     | 63197  | E2RKQ6 |
| Intermediate filament           | Keratin, type II cytoskeletal 2 epidermal                | KRT2         | 65016  | F1PTX4 |
| Cell metabolism                 | SAP domain containing ribonucleoprotein                  | SARNP        | 23759  | F1PVE3 |
| Extra-cellular matrix component | Dermatopontin                                            | DPT          | 24578  | E2RPQ6 |
| Cell metabolism                 | Proteasome subunit beta                                  | PSMB6        | 25686  | E2R0B6 |
| Intermediate filament           | Keratin 78                                               | KRT78        | 56429  | E2R4B0 |
| Cell metabolism                 | Uncharacterized protein                                  | LOC475521    | 26945  | F1PCE8 |
| Intermediate filament           | Keratin 72                                               | KRT72        | 57646  | E2QUT7 |
| Enzyme                          | Nicotinate-nucleotide pyrophosphorylase [carboxylating]  | QPRT         | 31301  | J9NZ55 |
| Cell metabolism                 | Growth arrest specific 2                                 | GAS2         | 35495  | F1PBV2 |
| Cell metabolism                 | Olfactory receptor                                       | OR6K6        | 38505  | E2R0T9 |
| Cell metabolism                 | Olfactory receptor                                       | LOC100687010 | 35594  | F1PU69 |
| Cell metabolism                 | Lysosomal protein transmembrane 4 beta                   | LAPTM4B      | 37360  | F1PGH9 |
| Growth factor                   | Fetuin B                                                 | FETUB        | 43162  | E2R9B6 |
| Enzyme                          | L-lactate dehydrogenase                                  | LDHA         | 40058  | F1PVW0 |
| Enzyme                          | L-lactate dehydrogenase                                  | LDHB         | 36931  | J9NT18 |
| Cell metabolism                 | Tropomyosin 1                                            | TPM1         | 37436  | F1P912 |
| Cell metabolism                 | Annexin A2                                               | ANXA2        | 38915  | Q6TEQ7 |
| Extra-cellular matrix component | Collagen alpha-2(I) chain                                | COL1A2       | 129835 | O46392 |
| Growth factor                   | Cellular communication network factor 2                  | CCN2         | 39909  | J9NTX8 |
| Extra-cellular matrix component | Thrombospondin 1                                         | THBS1        | 133521 | F1PBI6 |
| Extra-cellular matrix component | Biglycan                                                 | BGN          | 42268  | G1K2D8 |
| Cell metabolism                 | Serpin family A member 7                                 | SERPINA7     | 46789  | F1PB85 |
| Cell metabolism                 | Serpin family F member 1                                 | SERPINF1     | 46586  | F2Z4Q7 |
| Cell metabolism                 | Nerve growth factor receptor                             | NGFR         | 47024  | F1PAR7 |
| Cell metabolism                 | Mitogen-activated protein kinase associated protein 1    | MAPKAP1      | 59657  | E2RAY0 |
| Cell metabolism                 | Serpin family C member 1                                 | SERPINC1     | 53003  | E2RES2 |
| Cell metabolism                 | Uncharacterized protein                                  | ZNF385C      | 53432  | F1PZ48 |
| Extra-cellular matrix component | Collagen type V alpha 2 chain                            | COL5A2       | 145807 | F1PG08 |
| Enzyme                          | Dihydropyrimidinase like 3                               | DPYSL3       | 62236  | F1Q3Y2 |
| Cell metabolism                 | Fragile X mental retardation 1                           | FMR1         | 69446  | F1Q2U8 |
| Enzyme                          | TBK1 binding protein 1                                   | TBKBP1       | 67443  | F1P609 |
| Enzyme                          | Protein phosphatase 1 regulatory subunit                 | PPP1R12C     | 85052  | E2QUK2 |
| Anti-oxidant                    | Uncharacterized protein                                  | A2M          | 166540 | F6UME0 |
| Cell metabolism                 | Potassium calcium-activated channel subfamily N member 2 | KCNN2        | 93690  | F1PA33 |
| Cell metabolism                 | Otoancorin                                               | OTOA         | 127728 | E2RIN3 |

|                                 |                                                                |           |        |        |
|---------------------------------|----------------------------------------------------------------|-----------|--------|--------|
| Cell metabolism                 | KIAA0319                                                       | KIAA0319L | 106022 | F6XGU5 |
| Other, binding protein          | Latent transforming growth factor beta binding protein 1       | LTBP1     | 178675 | F1PLA1 |
| Cell metabolism                 | Rho guanine nucleotide exchange factor 40                      | ARHGEF40  | 175931 | F1PME6 |
| Enzyme, energy metabolism       | Adenylate cyclase 10                                           | ADCY10    | 189494 | E2RDZ3 |
| Extra-cellular matrix component | Collagen type V alpha 1 chain                                  | COL5A1    | 180707 | F1PHX8 |
| Cell metabolism                 | Fibronectin type III domain containing 3B                      | FNDC3B    | 134875 | E2REV4 |
| Cell metabolism                 | Uveal autoantigen with coiled-coil domains and ankyrin repeats | UACA      | 163865 | Q9GL21 |
| Growth factor                   | Fms related tyrosine kinase 1                                  | FLT1      | 152451 | F1PKV5 |
| Cell metabolism                 | Zinc finger protein 142                                        | ZNF142    | 211301 | J9P6V2 |
| Cell metabolism                 | Ryanodine receptor 1                                           | RYR1      | 572146 | F1PIS0 |
| Enzyme                          | Citron rho-interacting serine/threonine kinase                 | CIT       | 236845 | E2RPN3 |
| Extra-cellular matrix component | Laminin subunit alpha 3                                        | LAMA3     | 376682 | E2RPP1 |
| Enzyme                          | DNA-dependent protein kinase catalytic subunit                 | PRKDC     | 476572 | F1Q3H1 |
